# Supplementary material for: New modulated design and synthesis of quercetin–CuII/ZnII–Sn2IV scaffold as anticancer agents: in vitro DNA binding profile, DNA cleavage pathway and Topo-I activity
Source: Royal Society of Chemistry journal article supplement (doi:10.1039/c3dt50646k), 2013-01-01
Supplement: c3dt50646k.pdf [file c3dt50646k.pdf]

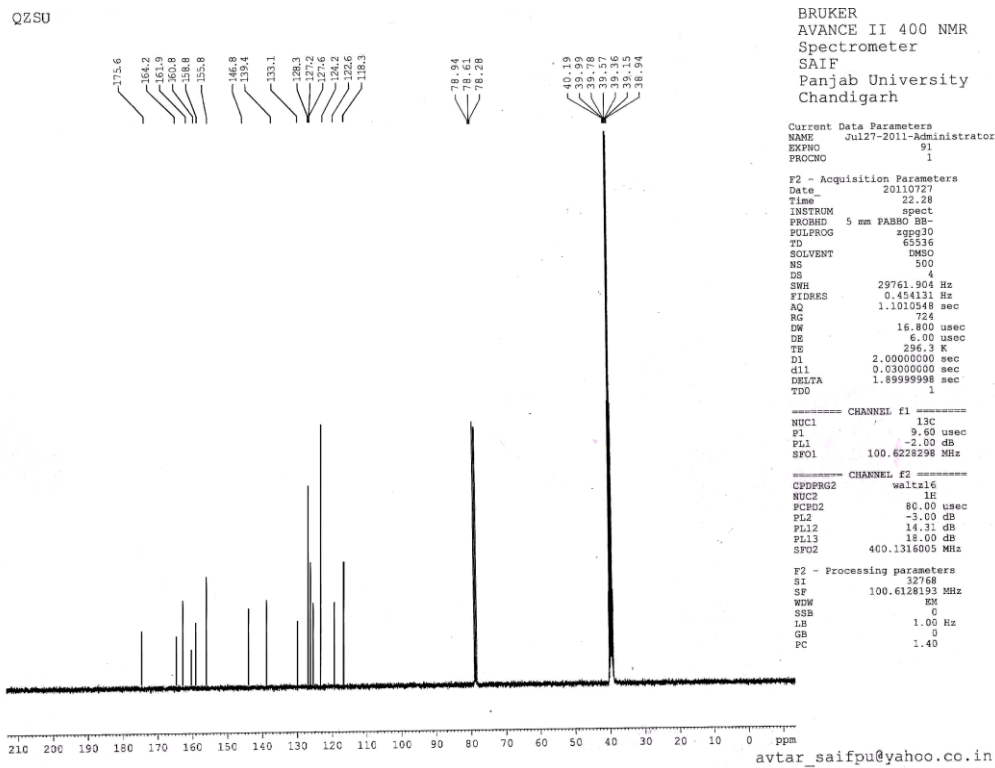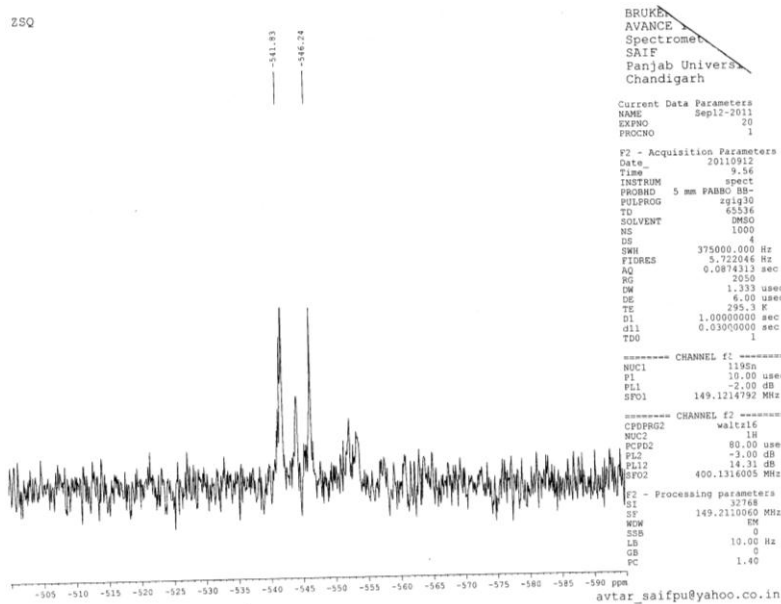

Fig. S1.  $^1\text{H}$ ,  $^{13}\text{C}$  and  $^{119}\text{Sn}$  NMR spectra of heterobimetallic complex **2**

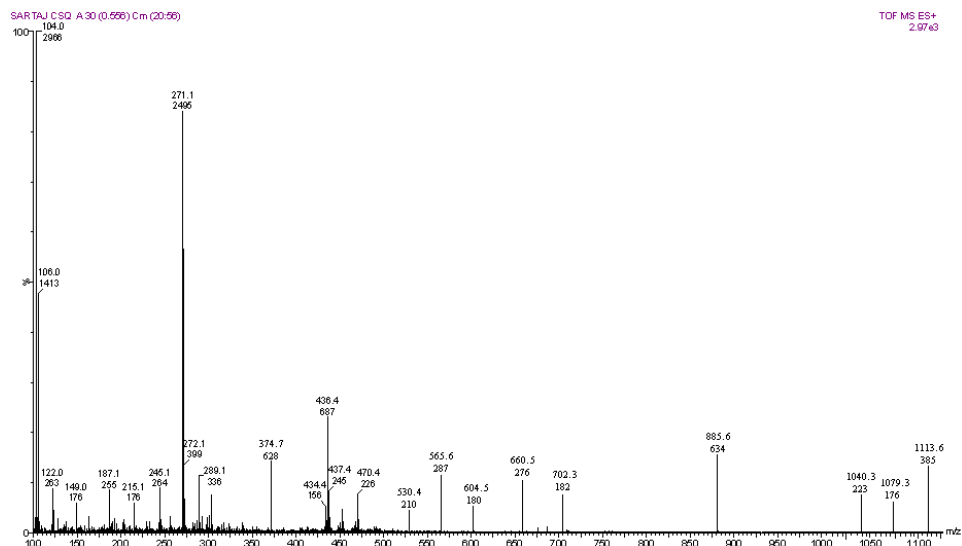

(a)

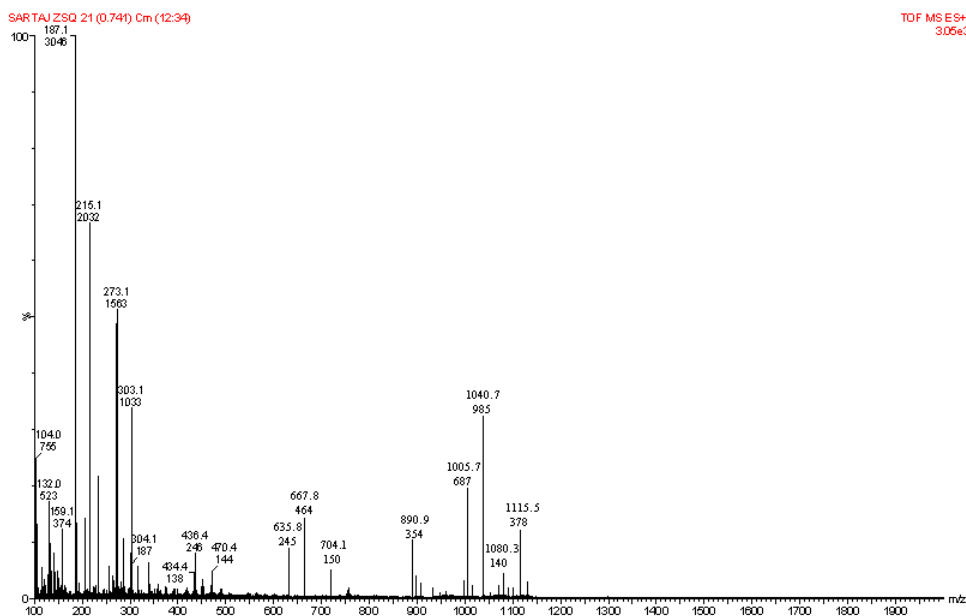

(b)

**Fig. S2.** Electrospray ionization (ESI) mass spectrum of (a) complex 1 and (b) complex 2.

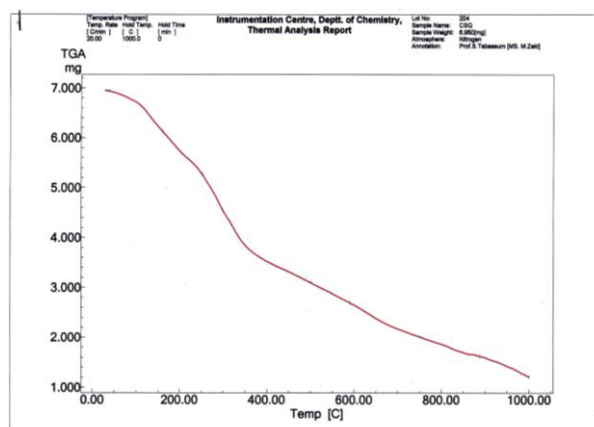

(a)

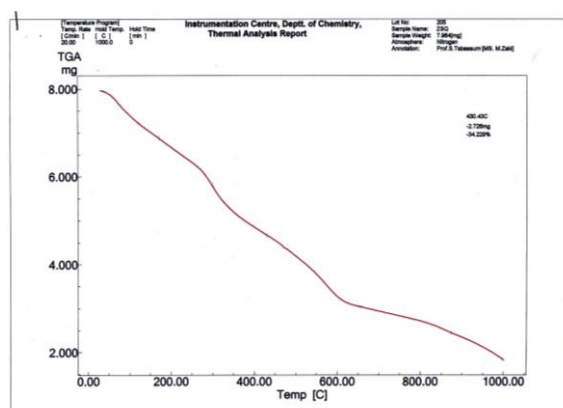

(b)

**Fig. S3.** TGA profiles of complexes (a) complex 1 and (b) complex 2

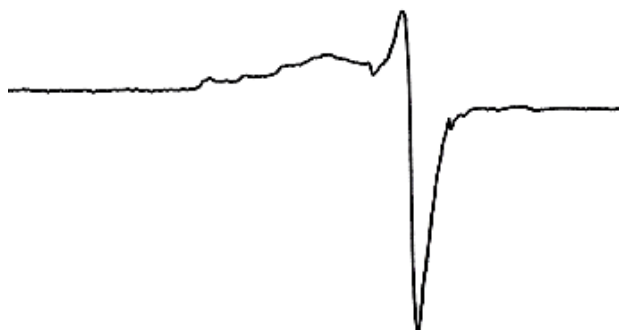

**Fig. S4.** X-band EPR spectrum of complex 1 at LNT in liquid state.

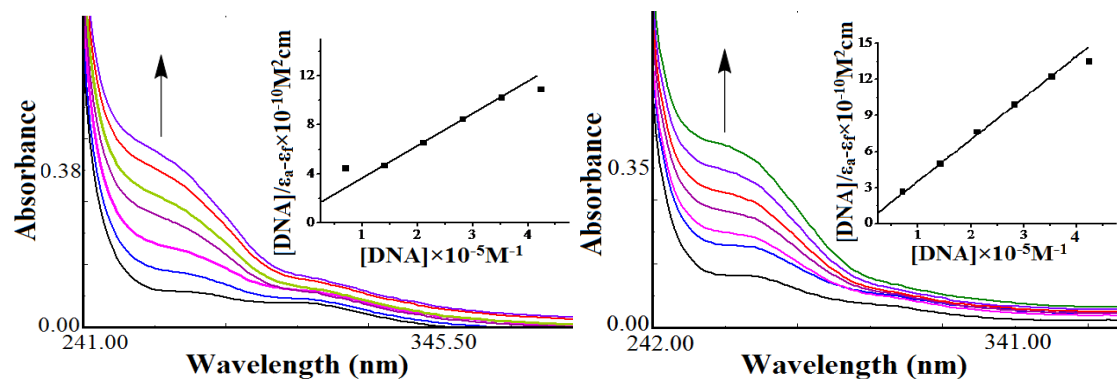

**Fig. S5.** Absorption spectra of complexes (a) **1** and (b) **2** in Tris–HCl buffer upon the addition of calf thymus DNA [complex] =  $6.67 \times 10^{-6}$  M, [DNA] =  $(0.70\text{--}4.24) \times 10^{-5}$  M. Arrow shows change in intensity with increasing concentration of DNA. Inset: plots of  $[\text{DNA}]/(\epsilon_a - \epsilon_f)$  versus  $[\text{DNA}]$  for the titration of DNA with the complex.

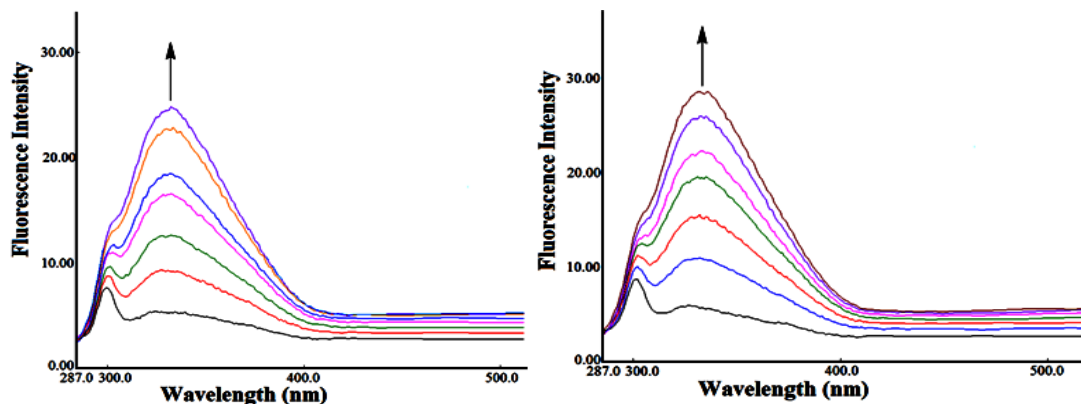

**Fig. S6.** Emission spectra of (a) complex **1**, (b) complex **2** in Tris–HCl buffer (pH 7.2) in the presence and absence of CT DNA at room temperature. Arrow shows change in intensity with increasing concentration of DNA.

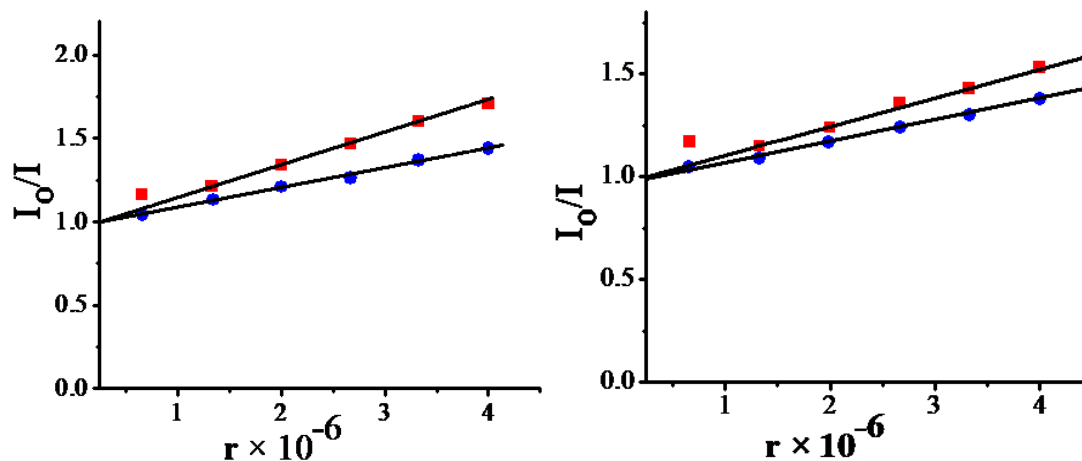

**Fig. S7.** Emission quenching curves of (a) complex 1 and (b) complex 2 with increasing concentration of  $[\text{Fe}(\text{CN})_6]^{4-}$  in the absence ( $\blacksquare$ ) and in the presence of CT-DNA ( $\bullet$ ).  $[\text{M}] = 6.67 \times 10^{-6}$  M,  $[\text{DNA}] = 0.70 \times 10^{-5}$  to  $4.24 \times 10^{-5}$  M.

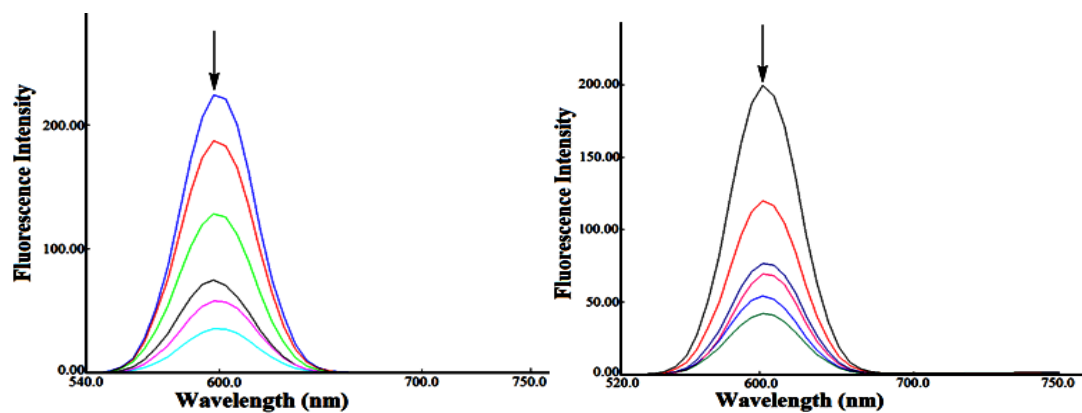

**Fig. S8.** Emission quenching spectra of CT DNA bound ethidium bromide in the presence of (a) complex 1 and (b) complex 2, in buffer 5 mM Tris-HCl/50 mM NaCl, pH = 7.2 at 25 C. Arrow shows change in intensity with increasing concentration of ethidium bromide.

**Table S1:** Change in spectral features of complexes **1** and **2** on interaction with CT DNA in 5 mM Tris-HCl/50 mM NaCl buffer (pH 7.2).

| <b>Complex</b> | <b><math>K_b</math> (<math>M^{-1}</math>)</b> | <b>Monitored at (nm)</b> | <b>% Hyperchromism</b> |
|----------------|-----------------------------------------------|--------------------------|------------------------|
| <b>1</b>       | $6.7 \times 10^5$                             | 271.77                   | 31.57                  |
| <b>2</b>       | $3.5 \times 10^5$                             | 267.79                   | 23.68                  |

**Table S2:** % Control growth at different concentration ( $\mu\text{g/ml}$ ) of complex **1**, **2** and ADR against various human carcinoma cell lines: U373MG (CNS), PC3 (Prostate), Hop62 (Lung), HL60 (Leukemia), HCT15 (Colon), A2780 (Ovarian) and HeLa (Cervix).

| Human CNS Cancer Cell Line U373MG        |              |       |       |       |              |       |       |       |              |       |       |       |                |       |       |       |
|------------------------------------------|--------------|-------|-------|-------|--------------|-------|-------|-------|--------------|-------|-------|-------|----------------|-------|-------|-------|
| % Control Growth                         |              |       |       |       |              |       |       |       |              |       |       |       |                |       |       |       |
| Drug Concentrations ( $\mu\text{g/ml}$ ) |              |       |       |       |              |       |       |       |              |       |       |       |                |       |       |       |
|                                          | Experiment 1 |       |       |       | Experiment 2 |       |       |       | Experiment 3 |       |       |       | Average Values |       |       |       |
|                                          | 10           | 20    | 40    | 80    | 10           | 20    | 40    | 80    | 10           | 20    | 40    | 80    | 10             | 20    | 40    | 80    |
| <b>2</b>                                 | 100.0        | 100.0 | 63.8  | 11.9  | 100.0        | 80.2  | 48.3  | 10.9  | 96.7         | 85.2  | 46.1  | 19.5  | 98.9           | 88.5  | 52.7  | 14.1  |
| <b>1</b>                                 | -44.0        | -47.8 | -58.8 | -67.6 | -58.4        | -59.8 | -61.3 | -70.1 | -52.8        | -55.0 | -55.8 | -58.8 | -51.7          | -54.2 | -58.6 | -65.5 |
| <b>ADR</b>                               | -10.9        | -19.1 | -36.6 | -38.6 | -15.0        | -21.0 | -39.5 | -45.1 | -15.5        | -20.2 | -44.4 | -45.5 | -13.8          | -20.1 | -40.1 | -43.1 |

| Human Prostate Cancer Cell Line PC3      |              |       |       |       |              |       |       |       |              |       |       |       |                |       |       |       |
|------------------------------------------|--------------|-------|-------|-------|--------------|-------|-------|-------|--------------|-------|-------|-------|----------------|-------|-------|-------|
| % Control Growth                         |              |       |       |       |              |       |       |       |              |       |       |       |                |       |       |       |
| Drug Concentrations ( $\mu\text{g/ml}$ ) |              |       |       |       |              |       |       |       |              |       |       |       |                |       |       |       |
|                                          | Experiment 1 |       |       |       | Experiment 2 |       |       |       | Experiment 3 |       |       |       | Average Values |       |       |       |
|                                          | 10           | 20    | 40    | 80    | 10           | 20    | 40    | 80    | 10           | 20    | 40    | 80    | 10             | 20    | 40    | 80    |
| <b>ZSQ</b>                               | 86.5         | 50.5  | 53.3  | 12.3  | 77.4         | 63.4  | 42.0  | 20.9  | 73.0         | 61.0  | 41.3  | 53.5  | 79.0           | 58.3  | 45.6  | 28.9  |
| <b>MZQ</b>                               | -43.0        | -44.8 | -49.5 | -52.9 | -42.8        | -46.6 | -54.3 | -55.4 | -36.2        | -44.3 | -45.6 | -52.9 | -40.7          | -45.3 | -49.8 | -53.7 |
| <b>ADR</b>                               | -51.5        | -53.2 | -58.3 | -59.8 | -51.8        | -58.0 | -58.4 | -64.7 | -53.2        | -59.3 | -60.9 | -63.1 | -52.2          | -56.8 | -59.2 | -62.5 |

| Human Lung Cancer Cell Line Hop62        |              |       |       |       |              |       |       |       |              |       |       |       |                |       |       |       |
|------------------------------------------|--------------|-------|-------|-------|--------------|-------|-------|-------|--------------|-------|-------|-------|----------------|-------|-------|-------|
| % Control Growth                         |              |       |       |       |              |       |       |       |              |       |       |       |                |       |       |       |
| Drug Concentrations ( $\mu\text{g/ml}$ ) |              |       |       |       |              |       |       |       |              |       |       |       |                |       |       |       |
|                                          | Experiment 1 |       |       |       | Experiment 2 |       |       |       | Experiment 3 |       |       |       | Average Values |       |       |       |
|                                          | 10           | 20    | 40    | 80    | 10           | 20    | 40    | 80    | 10           | 20    | 40    | 80    | 10             | 20    | 40    | 80    |
| <b>ZSQ</b>                               | 80.0         | 47.5  | 28.4  | 13.0  | 71.7         | 56.5  | 45.1  | 30.2  | 72.7         | 63.3  | 48.7  | 33.4  | 74.8           | 55.8  | 40.7  | 25.5  |
| <b>MZQ</b>                               | -16.7        | -21.6 | -38.9 | -45.1 | -28.6        | -50.9 | -53.3 | -56.1 | -25.1        | -43.7 | -50.4 | -59.3 | -23.5          | -38.7 | -47.5 | -53.5 |
| <b>ADR</b>                               | -7.0         | -13.0 | -20.2 | -21.4 | -11.9        | -15.4 | -16.0 | -16.3 | -8.2         | -18.9 | -23.3 | -24.2 | -9.1           | -15.8 | -19.8 | -20.6 |



| <b>Human Leukemia Cell Line HL60</b> |                     |           |           |           |                     |           |           |           |                     |           |           |           |                       |           |           |           |
|--------------------------------------|---------------------|-----------|-----------|-----------|---------------------|-----------|-----------|-----------|---------------------|-----------|-----------|-----------|-----------------------|-----------|-----------|-----------|
| <b>% Control Growth</b>              |                     |           |           |           |                     |           |           |           |                     |           |           |           |                       |           |           |           |
| <b>Drug Concentrations (µg/ml)</b>   |                     |           |           |           |                     |           |           |           |                     |           |           |           |                       |           |           |           |
|                                      | <b>Experiment 1</b> |           |           |           | <b>Experiment 2</b> |           |           |           | <b>Experiment 3</b> |           |           |           | <b>Average Values</b> |           |           |           |
|                                      | <b>10</b>           | <b>20</b> | <b>40</b> | <b>80</b> | <b>10</b>           | <b>20</b> | <b>40</b> | <b>80</b> | <b>10</b>           | <b>20</b> | <b>40</b> | <b>80</b> | <b>10</b>             | <b>20</b> | <b>40</b> | <b>80</b> |
| <b>ZSQ</b>                           | 71.4                | 47.5      | 44.5      | 26.5      | 66.8                | 36.9      | 23.8      | 15.4      | 82.0                | 42.9      | 39.2      | 26.9      | 73.4                  | 42.4      | 35.8      | 23.0      |
| <b>MZQ</b>                           | 24.3                | 12.0      | 5.8       | 4.0       | 21.7                | 10.0      | 8.8       | 4.2       | 21.2                | 7.1       | 1.5       | -3.5      | 22.4                  | 9.7       | 5.4       | 1.6       |
| <b>ADR</b>                           | 14.2                | -0.4      | -3.0      | -7.9      | 8.0                 | 7.4       | 5.3       | 0.4       | 15.8                | 15.0      | 12.0      | 11.1      | 12.7                  | 7.3       | 4.8       | 1.2       |

| <b>Human Colon Cancer Cell Line HCT15</b> |                     |           |           |           |                     |           |           |           |                     |           |           |           |                       |           |           |           |
|-------------------------------------------|---------------------|-----------|-----------|-----------|---------------------|-----------|-----------|-----------|---------------------|-----------|-----------|-----------|-----------------------|-----------|-----------|-----------|
| <b>% Control Growth</b>                   |                     |           |           |           |                     |           |           |           |                     |           |           |           |                       |           |           |           |
| <b>Drug Concentrations (µg/ml)</b>        |                     |           |           |           |                     |           |           |           |                     |           |           |           |                       |           |           |           |
|                                           | <b>Experiment 1</b> |           |           |           | <b>Experiment 2</b> |           |           |           | <b>Experiment 3</b> |           |           |           | <b>Average Values</b> |           |           |           |
|                                           | <b>10</b>           | <b>20</b> | <b>40</b> | <b>80</b> | <b>10</b>           | <b>20</b> | <b>40</b> | <b>80</b> | <b>10</b>           | <b>20</b> | <b>40</b> | <b>80</b> | <b>10</b>             | <b>20</b> | <b>40</b> | <b>80</b> |
| <b>ZSQ</b>                                | 100.0               | 90.7      | 45.0      | 22.6      | 100.0               | 80.3      | 39.0      | 25.3      | 89.6                | 72.9      | 40.8      | 25.4      | 96.5                  | 81.3      | 41.6      | 24.4      |
| <b>MZQ</b>                                | -46.4               | -56.3     | -58.2     | -60.3     | -40.3               | -56.2     | -56.5     | -57.5     | -45.4               | -51.6     | -50.8     | -58.1     | -44.0                 | -54.7     | -55.2     | -58.6     |
| <b>ADR</b>                                | -18.5               | -23.4     | -27.4     | -37.0     | -21.6               | -22.1     | -23.4     | -28.0     | -15.2               | -15.3     | -16.7     | -24.9     | -18.4                 | -20.3     | -22.5     | -30.0     |

| <b>Human Ovarian Cancer Cell Line A2780</b> |                     |           |           |           |                     |           |           |           |                     |           |           |           |                       |           |           |           |
|---------------------------------------------|---------------------|-----------|-----------|-----------|---------------------|-----------|-----------|-----------|---------------------|-----------|-----------|-----------|-----------------------|-----------|-----------|-----------|
| <b>% Control Growth</b>                     |                     |           |           |           |                     |           |           |           |                     |           |           |           |                       |           |           |           |
| <b>Drug Concentrations (µg/ml)</b>          |                     |           |           |           |                     |           |           |           |                     |           |           |           |                       |           |           |           |
|                                             | <b>Experiment 1</b> |           |           |           | <b>Experiment 2</b> |           |           |           | <b>Experiment 3</b> |           |           |           | <b>Average Values</b> |           |           |           |
|                                             | <b>10</b>           | <b>20</b> | <b>40</b> | <b>80</b> | <b>10</b>           | <b>20</b> | <b>40</b> | <b>80</b> | <b>10</b>           | <b>20</b> | <b>40</b> | <b>80</b> | <b>10</b>             | <b>20</b> | <b>40</b> | <b>80</b> |
| <b>ZSQ</b>                                  | 91.5                | 70.4      | 62.6      | 11.2      | 100.0               | 80.0      | 59.2      | 7.9       | 91.9                | 80.4      | 49.8      | 19.1      | 94.5                  | 76.9      | 57.2      | 12.7      |
| <b>MZQ</b>                                  | 100.0               | 100.0     | 100.0     | 90.5      | 100.0               | 100.0     | 100.0     | 5.2       | 100.0               | 100.0     | 100.0     | 90.9      | 100.0                 | 100.0     | 100.0     | 62.2      |
| <b>ADR</b>                                  | 76.0                | 68.2      | 29.1      | 7.3       | 80.0                | 54.2      | 33.9      | 1.8       | 61.2                | 34.4      | 20.2      | 8.2       | 72.4                  | 52.3      | 27.7      | 5.8       |

|            | <b>Human Cervix Cancer Cell Line HeLa</b>                |           |           |           |                     |           |           |           |                     |           |           |           |                       |           |           |           |
|------------|----------------------------------------------------------|-----------|-----------|-----------|---------------------|-----------|-----------|-----------|---------------------|-----------|-----------|-----------|-----------------------|-----------|-----------|-----------|
|            | <b>% Control Growth</b>                                  |           |           |           |                     |           |           |           |                     |           |           |           |                       |           |           |           |
|            | <b>Drug Concentrations (<math>\mu\text{g/ml}</math>)</b> |           |           |           |                     |           |           |           |                     |           |           |           |                       |           |           |           |
|            | <b>Experiment 1</b>                                      |           |           |           | <b>Experiment 2</b> |           |           |           | <b>Experiment 3</b> |           |           |           | <b>Average Values</b> |           |           |           |
|            | <b>10</b>                                                | <b>20</b> | <b>40</b> | <b>80</b> | <b>10</b>           | <b>20</b> | <b>40</b> | <b>80</b> | <b>10</b>           | <b>20</b> | <b>40</b> | <b>80</b> | <b>10</b>             | <b>20</b> | <b>40</b> | <b>80</b> |
| <b>ZSQ</b> | 40.7                                                     | 15.4      | -11.0     | -14.6     | 32.7                | 13.6      | -12.1     | -13.1     | 27.3                | 11.4      | -10.8     | -21.1     | 33.5                  | 13.4      | -11.3     | -16.3     |
| <b>MZQ</b> | -57.9                                                    | -64.6     | -66.9     | -69.9     | -61.8               | -68.3     | -73.3     | -74.9     | -66.7               | -72.5     | -74.4     | -75.6     | -62.1                 | -68.5     | -71.5     | -73.5     |
| <b>ADR</b> | -52.3                                                    | -66.8     | -67.3     | -67.8     | -61.0               | -73.6     | -75.2     | -76.2     | -68.0               | -76.3     | -76.7     | -78.3     | -60.4                 | -72.2     | -73.1     | -74.1     |
